# Supplementary material
Source: HighWire-hosted journal article supplement (https://bmjopen.bmj.com/content/12/4/e055803)
Supplement: inline-supplementary-material-1 [file inline-supplementary-material-1.pdf]

| <b>Domain 1 – Preoperative anatomy</b>                                                                                                                                                                                                                                                                                                                                               |
|--------------------------------------------------------------------------------------------------------------------------------------------------------------------------------------------------------------------------------------------------------------------------------------------------------------------------------------------------------------------------------------|
| <p>Is “proximal aortic neck length &lt;15 mm” an important predictor of adverse events after EVAR that should be considered in risk stratification and surveillance strategies?</p> <ol style="list-style-type: none"> <li>1. Strongly agree</li> <li>2. Agree</li> <li>3. Disagree</li> <li>4. Strongly disagree</li> <li>5. Can’t say</li> </ol> <p>Comments/suggestions:</p>      |
| <p>If you strongly agree or agree with the statement, how would you stratify the importance of the predictor within the context of risk stratification and surveillance strategies?</p> <ol style="list-style-type: none"> <li>1. High importance</li> <li>2. Medium importance</li> <li>3. Low importance</li> </ol>                                                                |
| <p>Is “proximal aortic neck diameter &gt;30 mm” an important predictor of adverse events after EVAR that should be considered in risk stratification and surveillance strategies?</p> <ol style="list-style-type: none"> <li>1. Strongly agree</li> <li>2. Agree</li> <li>3. Disagree</li> <li>4. Strongly disagree</li> <li>5. Can’t say</li> </ol> <p>Comments/suggestions:</p>    |
| <p>If you strongly agree or agree with the statement, how would you stratify the importance of the predictor within the context of risk stratification and surveillance strategies?</p> <ol style="list-style-type: none"> <li>1. High importance</li> <li>2. Medium importance</li> <li>3. Low importance</li> </ol>                                                                |
| <p>Is “infra-renal neck angulation &gt;60 degrees” an important predictor of adverse events after EVAR that should be considered in risk stratification and surveillance strategies?</p> <ol style="list-style-type: none"> <li>1. Strongly agree</li> <li>2. Agree</li> <li>3. Disagree</li> <li>4. Strongly disagree</li> <li>5. Can’t say</li> </ol> <p>Comments/suggestions:</p> |
| <p>If you strongly agree or agree with the statement, how would you stratify the importance of the predictor within the context of risk stratification and surveillance strategies?</p> <ol style="list-style-type: none"> <li>1. High importance</li> <li>2. Medium importance</li> <li>3. Low importance</li> </ol>                                                                |

|                                                                                                                                                                                                                                                                                                                                                                                                       |
|-------------------------------------------------------------------------------------------------------------------------------------------------------------------------------------------------------------------------------------------------------------------------------------------------------------------------------------------------------------------------------------------------------|
| <p>Is "<i>supra-renal neck angulation &gt;45 degrees</i>" an important predictor of adverse events after EVAR that should be considered in risk stratification and surveillance strategies?</p> <ol style="list-style-type: none"><li>1. Strongly agree</li><li>2. Agree</li><li>3. Disagree</li><li>4. Strongly disagree</li><li>5. Can't say</li></ol> <p>Comments/suggestions:</p>                 |
| <p>If you strongly agree or agree with the statement, how would you stratify the importance of the predictor within the context of risk stratification and surveillance strategies?</p> <ol style="list-style-type: none"><li>1. High importance</li><li>2. Medium importance</li><li>3. Low importance</li></ol>                                                                                     |
| <p>Is "<i>&gt;50% circumferential proximal aortic neck calcification</i>" an important predictor of adverse events after EVAR that should be considered in risk stratification and surveillance strategies?</p> <ol style="list-style-type: none"><li>1. Strongly agree</li><li>2. Agree</li><li>3. Disagree</li><li>4. Strongly disagree</li><li>5. Can't say</li></ol> <p>Comments/suggestions:</p> |
| <p>If you strongly agree or agree with the statement, how would you stratify the importance of the predictor within the context of risk stratification and surveillance strategies?</p> <ol style="list-style-type: none"><li>1. High importance</li><li>2. Medium importance</li><li>3. Low importance</li></ol>                                                                                     |
| <p>Is "<i>&gt;50% circumferential proximal aortic neck thrombus</i>" an important predictor of adverse events after EVAR that should be considered in risk stratification and surveillance strategies?</p> <ol style="list-style-type: none"><li>1. Strongly agree</li><li>2. Agree</li><li>3. Disagree</li><li>4. Strongly disagree</li><li>5. Can't say</li></ol> <p>Comments/suggestions:</p>      |
| <p>If you strongly agree or agree with the statement, how would you stratify the importance of the predictor within the context of risk stratification and surveillance strategies?</p> <ol style="list-style-type: none"><li>1. High importance</li><li>2. Medium importance</li><li>3. Low importance</li></ol>                                                                                     |

|                                                                                                                                                                                                                                                                                                                                                                                                                                                 |
|-------------------------------------------------------------------------------------------------------------------------------------------------------------------------------------------------------------------------------------------------------------------------------------------------------------------------------------------------------------------------------------------------------------------------------------------------|
| <p>Is “<i>conical proximal aortic neck</i>” an important predictor of adverse events after EVAR that should be considered in risk stratification and surveillance strategies?</p> <ol style="list-style-type: none"> <li>1. Strongly agree</li> <li>2. Agree</li> <li>3. Disagree</li> <li>4. Strongly disagree</li> <li>5. Can't say</li> </ol> <p>Comments/suggestions:</p>                                                                   |
| <p>If you strongly agree or agree with the statement, how would you stratify the importance of the predictor within the context of risk stratification and surveillance strategies?</p> <ol style="list-style-type: none"> <li>1. High importance</li> <li>2. Medium importance</li> <li>3. Low importance</li> </ol>                                                                                                                           |
| <p>Is “<i>maximal AAA diameter &gt;70 mm</i>” an important predictor of adverse events after EVAR that should be considered in risk stratification and surveillance strategies?</p> <ol style="list-style-type: none"> <li>1. Strongly agree</li> <li>2. Agree</li> <li>3. Disagree</li> <li>4. Strongly disagree</li> <li>5. Can't say</li> </ol> <p>Comments/suggestions:</p>                                                                 |
| <p>If you strongly agree or agree with the statement, how would you stratify the importance of the predictor within the context of risk stratification and surveillance strategies?</p> <ol style="list-style-type: none"> <li>1. High importance</li> <li>2. Medium importance</li> <li>3. Low importance</li> </ol>                                                                                                                           |
| <p>Is “<i>&gt;2 patent lumbar arteries plus non-patent IMA or &gt;1 patent lumbar artery plus patent IMA</i>” an important predictor of adverse events after EVAR that should be considered in risk stratification and surveillance strategies?</p> <ol style="list-style-type: none"> <li>1. Strongly agree</li> <li>2. Agree</li> <li>3. Disagree</li> <li>4. Strongly disagree</li> <li>5. Can't say</li> </ol> <p>Comments/suggestions:</p> |
| <p>If you strongly agree or agree with the statement, how would you stratify the importance of the predictor within the context of risk stratification and surveillance strategies?</p> <ol style="list-style-type: none"> <li>1. High importance</li> <li>2. Medium importance</li> <li>3. Low importance</li> </ol>                                                                                                                           |

|                                                                                                                                                                                                                                                                                                                                                                                                                                           |
|-------------------------------------------------------------------------------------------------------------------------------------------------------------------------------------------------------------------------------------------------------------------------------------------------------------------------------------------------------------------------------------------------------------------------------------------|
| <p>Is "<i>distal aortic neck diameter &lt;18 mm</i>" an important predictor of adverse events after EVAR that should be considered in risk stratification and surveillance strategies?</p> <ol style="list-style-type: none"> <li>1. Strongly agree</li> <li>2. Agree</li> <li>3. Disagree</li> <li>4. Strongly disagree</li> <li>5. Can't say</li> </ol> <p>Comments/suggestions:</p>                                                    |
| <p>If you strongly agree or agree with the statement, how would you stratify the importance of the predictor within the context of risk stratification and surveillance strategies?</p> <ol style="list-style-type: none"> <li>1. High importance</li> <li>2. Medium importance</li> <li>3. Low importance</li> </ol>                                                                                                                     |
| <p>Is "<i>common iliac artery aneurysm (if common iliac artery used as a landing zone)</i>"<sup>a</sup> an important predictor of adverse events after EVAR that should be considered in risk stratification and surveillance strategies?</p> <ol style="list-style-type: none"> <li>1. Strongly agree</li> <li>2. Agree</li> <li>3. Disagree</li> <li>4. Strongly disagree</li> <li>5. Can't say</li> </ol> <p>Comments/suggestions:</p> |
| <p>If you strongly agree or agree with the statement, how would you stratify the importance of the predictor within the context of risk stratification and surveillance strategies?</p> <ol style="list-style-type: none"> <li>1. High importance</li> <li>2. Medium importance</li> <li>3. Low importance</li> </ol>                                                                                                                     |
| <p>Is "<i>distal iliac landing zone diameter &gt;20 mm</i>" an important predictor of adverse events after EVAR that should be considered in risk stratification and surveillance strategies?</p> <ol style="list-style-type: none"> <li>1. Strongly agree</li> <li>2. Agree</li> <li>3. Disagree</li> <li>4. Strongly disagree</li> <li>5. Can't say</li> </ol> <p>Comments/suggestions:</p>                                             |
| <p>If you strongly agree or agree with the statement, how would you stratify the importance of the predictor within the context of risk stratification and surveillance strategies?</p> <ol style="list-style-type: none"> <li>1. High importance</li> <li>2. Medium importance</li> <li>3. Low importance</li> </ol>                                                                                                                     |

|                                                                                                                                                                                                                                                                                                                                                                                              |
|----------------------------------------------------------------------------------------------------------------------------------------------------------------------------------------------------------------------------------------------------------------------------------------------------------------------------------------------------------------------------------------------|
| <p>Is "<i>distal iliac landing zone length &lt;10 mm</i>" an important predictor of adverse events after EVAR that should be considered in risk stratification and surveillance strategies?</p> <ol style="list-style-type: none"> <li>1. Strongly agree</li> <li>2. Agree</li> <li>3. Disagree</li> <li>4. Strongly disagree</li> <li>5. Can't say</li> </ol> <p>Comments/suggestions:</p>  |
| <p>If you strongly agree or agree with the statement, how would you stratify the importance of the predictor within the context of risk stratification and surveillance strategies?</p> <ol style="list-style-type: none"> <li>1. High importance</li> <li>2. Medium importance</li> <li>3. Low importance</li> </ol>                                                                        |
| <p>Is "<i>iliac tortuosity index &gt;1.25</i>"<sup>b</sup> an important predictor of adverse events after EVAR that should be considered in risk stratification and surveillance strategies?</p> <ol style="list-style-type: none"> <li>1. Strongly agree</li> <li>2. Agree</li> <li>3. Disagree</li> <li>4. Strongly disagree</li> <li>5. Can't say</li> </ol> <p>Comments/suggestions:</p> |
| <p>If you strongly agree or agree with the statement, how would you stratify the importance of the predictor within the context of risk stratification and surveillance strategies?</p> <ol style="list-style-type: none"> <li>1. High importance</li> <li>2. Medium importance</li> <li>3. Low importance</li> </ol>                                                                        |
| <p>Would you suggest any other preoperative anatomy-related predictors of adverse outcomes after EVAR?</p>                                                                                                                                                                                                                                                                                   |
| <p><b>Domain 2 - Aortic device</b></p>                                                                                                                                                                                                                                                                                                                                                       |
| <p>Is "<i>anatomy non-complaint with IFU</i>" an important predictor of adverse events after EVAR that should be considered in risk stratification and surveillance strategies?</p> <ol style="list-style-type: none"> <li>1. Strongly agree</li> <li>2. Agree</li> <li>3. Disagree</li> <li>4. Strongly disagree</li> <li>5. Can't say</li> </ol> <p>Comments/suggestions:</p>              |
| <p>If you strongly agree or agree with the statement, how would you stratify the importance of the predictor within the context of risk stratification and surveillance strategies?</p> <ol style="list-style-type: none"> <li>1. High importance</li> <li>2. Medium importance</li> <li>3. Low importance</li> </ol>                                                                        |
| <p>Is "<i>supra-renal fixation device</i>" an important predictor of adverse events after EVAR that should be considered in risk stratification and surveillance strategies?</p>                                                                                                                                                                                                             |

|                                                                                                                                                                                                                                                                                                                                                                                                                                                   |
|---------------------------------------------------------------------------------------------------------------------------------------------------------------------------------------------------------------------------------------------------------------------------------------------------------------------------------------------------------------------------------------------------------------------------------------------------|
| <ol style="list-style-type: none"> <li>1. Strongly agree</li> <li>2. Agree</li> <li>3. Disagree</li> <li>4. Strongly disagree</li> <li>5. Can't say</li> </ol> <p>Comments/suggestions:</p>                                                                                                                                                                                                                                                       |
| <p>If you strongly agree or agree with the statement, how would you stratify the importance of the predictor within the context of risk stratification and surveillance strategies?</p> <ol style="list-style-type: none"> <li>1. High importance</li> <li>2. Medium importance</li> <li>3. Low importance</li> </ol>                                                                                                                             |
| <p>Is "<i>infra-renal fixation device</i>" an important predictor of adverse events after EVAR that should be considered in risk stratification and surveillance strategies?</p> <ol style="list-style-type: none"> <li>1. Strongly agree</li> <li>2. Agree</li> <li>3. Disagree</li> <li>4. Strongly disagree</li> <li>5. Can't say</li> </ol> <p>Comments/suggestions:</p>                                                                      |
| <p>If you strongly agree or agree with the statement, how would you stratify the importance of the predictor within the context of risk stratification and surveillance strategies?</p> <ol style="list-style-type: none"> <li>1. High importance</li> <li>2. Medium importance</li> <li>3. Low importance</li> </ol>                                                                                                                             |
| <p>Is "<i>EVAR procedure not performed according to IFU</i>" an important predictor of adverse events after EVAR that should be considered in risk stratification and surveillance strategies?</p> <ol style="list-style-type: none"> <li>1. Strongly agree</li> <li>2. Agree</li> <li>3. Disagree</li> <li>4. Strongly disagree</li> <li>5. Can't say</li> </ol> <p>Comments/suggestions:</p>                                                    |
| <p>If you strongly agree or agree with the statement, how would you stratify the importance of the predictor within the context of risk stratification and surveillance strategies?</p> <ol style="list-style-type: none"> <li>1. High importance</li> <li>2. Medium importance</li> <li>3. Low importance</li> </ol>                                                                                                                             |
| <p>Would you suggest any other aortic device-related predictors of adverse outcomes after EVAR?</p>                                                                                                                                                                                                                                                                                                                                               |
| <p><b>Domain 3 - Procedure performance</b></p>                                                                                                                                                                                                                                                                                                                                                                                                    |
| <p>Is "<i>suboptimal position of endografts in relation to distal, overlapping, and proximal landing zones</i>" an important predictor of adverse events after EVAR that should be considered in risk stratification and surveillance strategies?</p> <ol style="list-style-type: none"> <li>1. Strongly agree</li> <li>2. Agree</li> <li>3. Disagree</li> <li>4. Strongly disagree</li> <li>5. Can't say</li> </ol> <p>Comments/suggestions:</p> |
| <p>If you strongly agree or agree with the statement, how would you stratify the importance of the predictor within the context of risk stratification and surveillance strategies?</p>                                                                                                                                                                                                                                                           |

|                                                                                                                                                                                                                                                                                                                                                                                                                 |
|-----------------------------------------------------------------------------------------------------------------------------------------------------------------------------------------------------------------------------------------------------------------------------------------------------------------------------------------------------------------------------------------------------------------|
| <ol style="list-style-type: none"> <li>1. High importance</li> <li>2. Medium importance</li> <li>3. Low importance</li> </ol>                                                                                                                                                                                                                                                                                   |
| <p>Is “<i>non-type II endoleak/kink/stenosis on completion angiogram</i>” an important predictor of adverse events after EVAR that should be considered in risk stratification and surveillance strategies?</p> <ol style="list-style-type: none"> <li>1. Strongly agree</li> <li>2. Agree</li> <li>3. Disagree</li> <li>4. Strongly disagree</li> <li>5. Can't say</li> </ol> <p>Comments/suggestions:</p>     |
| <p>If you strongly agree or agree with the statement, how would you stratify the importance of the predictor within the context of risk stratification and surveillance strategies?</p> <ol style="list-style-type: none"> <li>1. High importance</li> <li>2. Medium importance</li> <li>3. Low importance</li> </ol>                                                                                           |
| <p>Is “<i>unplanned adjunctive procedures in the proximal neck</i>” an important predictor of adverse events after EVAR that should be considered in risk stratification and surveillance strategies?</p> <ol style="list-style-type: none"> <li>1. Strongly agree</li> <li>2. Agree</li> <li>3. Disagree</li> <li>4. Strongly disagree</li> <li>5. Can't say</li> </ol> <p>Comments/suggestions:</p>           |
| <p>If you strongly agree or agree with the statement, how would you stratify the importance of the predictor within the context of risk stratification and surveillance strategies?</p> <ol style="list-style-type: none"> <li>1. High importance</li> <li>2. Medium importance</li> <li>3. Low importance</li> </ol>                                                                                           |
| <p>Is “<i>unplanned adjunctive procedure other than in the proximal neck</i>” an important predictor of adverse events after EVAR that should be considered in risk stratification and surveillance strategies?</p> <ol style="list-style-type: none"> <li>1. Strongly agree</li> <li>2. Agree</li> <li>3. Disagree</li> <li>4. Strongly disagree</li> <li>5. Can't say</li> </ol> <p>Comments/suggestions:</p> |
| <p>If you strongly agree or agree with the statement, how would you stratify the importance of the predictor within the context of risk stratification and surveillance strategies?</p> <ol style="list-style-type: none"> <li>1. High importance</li> <li>2. Medium importance</li> <li>3. Low importance</li> </ol>                                                                                           |
| <p>Would you suggest any other procedure performance-related predictors of adverse outcomes after EVAR?</p>                                                                                                                                                                                                                                                                                                     |
| <p><b>Domain 4 - Postoperative surveillance imaging</b></p>                                                                                                                                                                                                                                                                                                                                                     |
| <p>Is “<i>non-satisfactory seal at landing/overlapping zones</i>” an important predictor of adverse events after EVAR that should be considered in risk stratification and surveillance strategies?</p> <ol style="list-style-type: none"> <li>1. Strongly agree</li> </ol>                                                                                                                                     |

|                                                                                                                                                                                                                                                                                                                                                                                                           |
|-----------------------------------------------------------------------------------------------------------------------------------------------------------------------------------------------------------------------------------------------------------------------------------------------------------------------------------------------------------------------------------------------------------|
| <ol style="list-style-type: none"> <li>2. Agree</li> <li>3. Disagree</li> <li>4. Strongly disagree</li> <li>5. Can't say</li> </ol> <p>Comments/suggestions:</p>                                                                                                                                                                                                                                          |
| <p>If you strongly agree or agree with the statement, how would you stratify the importance of the predictor within the context of risk stratification and surveillance strategies?</p> <ol style="list-style-type: none"> <li>1. High importance</li> <li>2. Medium importance</li> <li>3. Low importance</li> </ol>                                                                                     |
| <p>Is "endoleak (type II)" an important predictor of adverse events after EVAR that should be considered in risk stratification and surveillance strategies?</p> <ol style="list-style-type: none"> <li>1. Strongly agree</li> <li>2. Agree</li> <li>3. Disagree</li> <li>4. Strongly disagree</li> <li>5. Can't say</li> </ol> <p>Comments/suggestions:</p>                                              |
| <p>If you strongly agree or agree with the statement, how would you stratify the importance of the predictor within the context of risk stratification and surveillance strategies?</p> <ol style="list-style-type: none"> <li>1. High importance</li> <li>2. Medium importance</li> <li>3. Low importance</li> </ol>                                                                                     |
| <p>Is "no sac shrinkage (stable or expanding aneurysm sac)"<sup>c</sup> an important predictor of adverse events after EVAR that should be considered in risk stratification and surveillance strategies?</p> <ol style="list-style-type: none"> <li>1. Strongly agree</li> <li>2. Agree</li> <li>3. Disagree</li> <li>4. Strongly disagree</li> <li>5. Can't say</li> </ol> <p>Comments/suggestions:</p> |
| <p>If you strongly agree or agree with the statement, how would you stratify the importance of the predictor within the context of risk stratification and surveillance strategies?</p> <ol style="list-style-type: none"> <li>1. High importance</li> <li>2. Medium importance</li> <li>3. Low importance</li> </ol>                                                                                     |
| <p>Is "sac expansion"<sup>c</sup> an important predictor of adverse events after EVAR that should be considered in risk stratification and surveillance strategies?</p> <ol style="list-style-type: none"> <li>1. Strongly agree</li> <li>2. Agree</li> <li>3. Disagree</li> <li>4. Strongly disagree</li> <li>5. Can't say</li> </ol> <p>Comments/suggestions:</p>                                       |
| <p>If you strongly agree or agree with the statement, how would you stratify the importance of the predictor within the context of risk stratification and surveillance strategies?</p> <ol style="list-style-type: none"> <li>1. High importance</li> <li>2. Medium importance</li> <li>3. Low importance</li> </ol>                                                                                     |
| <p>Would you suggest any other postoperative surveillance imaging-related predictors of adverse outcomes after EVAR?</p>                                                                                                                                                                                                                                                                                  |



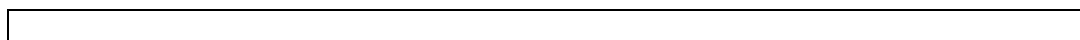

<sup>a</sup>defined as diameter >25 mm.

<sup>b</sup>calculated by dividing the distance along the central lumen line from the aortic bifurcation to the common femoral artery by the straight-line distance from the aortic bifurcation to the common femoral artery. A ratio of <1.25 is optimal while a ratio of >1.6 is deemed as severe.

<sup>c</sup>sac expansion or sac shrinkage is defined as a 5 cm increase or decrease in the size of the abdominal aortic aneurysm sac between two surveillance imaging tests of the same mode.

**Appendix 1.** Tier 1 survey: Defining prognostic factors of endovascular aneurysm repair that should be considered in risk stratification and surveillance strategies. AAA, abdominal aortic aneurysm; EVAR, endovascular aneurysm repair; IFU, instructions for use; IMA, inferior mesenteric artery.
