# Supplementary material
Source: HighWire-hosted journal article supplement (https://bmjopen.bmj.com/content/12/4/e055803)
Supplement: inline-supplementary-material-3 [file inline-supplementary-material-3.pdf]

|                                                                                                                                                                                                                                                                                                                                                                                                                          |
|--------------------------------------------------------------------------------------------------------------------------------------------------------------------------------------------------------------------------------------------------------------------------------------------------------------------------------------------------------------------------------------------------------------------------|
| <p>Surveillance strategies should be risk specific, e.g. patients that have been judged to be high risk for developing adverse events after EVAR should have different surveillance than low risk patients.</p> <ol style="list-style-type: none"> <li>1. Strongly agree</li> <li>2. Agree</li> <li>3. Disagree</li> <li>4. Strongly disagree</li> <li>5. Can't say</li> </ol> <p>Comments/suggestions:</p>              |
| <p><b>Low risk</b></p> <p>For <b>low risk</b> patients, surveillance should be with US and X-ray annually, with a CT angiogram at 5 years, unless there is sac expansion and/or migration, when CT should be performed.</p> <ol style="list-style-type: none"> <li>6. Strongly agree</li> <li>7. Agree</li> <li>8. Disagree</li> <li>9. Strongly disagree</li> <li>10. Can't say</li> </ol> <p>Comments/suggestions:</p> |
| <p>For <b>low risk</b> patients, surveillance should be with US annually, with a CT angiogram at 5 years, unless there is sac expansion, when CT should be performed.</p> <ol style="list-style-type: none"> <li>1. Strongly agree</li> <li>2. Agree</li> <li>3. Disagree</li> <li>4. Strongly disagree</li> <li>5. Can't say</li> </ol> <p>Comments/suggestions:</p>                                                    |
| <p>For <b>low risk</b> patients, surveillance should be with US and X-ray annually, with a CT angiogram only if there is sac expansion and/or migration.</p> <ol style="list-style-type: none"> <li>1. Strongly agree</li> <li>2. Agree</li> <li>3. Disagree</li> <li>4. Strongly disagree</li> <li>5. Can't say</li> </ol> <p>Comments/suggestions:</p>                                                                 |
| <p>For <b>low risk</b> patients, surveillance should be with US annually, with a CT angiogram only if there is sac expansion.</p> <ol style="list-style-type: none"> <li>1. Strongly agree</li> <li>2. Agree</li> <li>3. Disagree</li> <li>4. Strongly disagree</li> <li>5. Can't say</li> </ol> <p>Comments/suggestions:</p>                                                                                            |
| <p><b>Low risk</b> patients should have no surveillance at all.</p> <ol style="list-style-type: none"> <li>1. Strongly agree</li> <li>2. Agree</li> <li>3. Disagree</li> <li>4. Strongly disagree</li> <li>5. Can't say</li> </ol> <p>Comments/suggestions:</p>                                                                                                                                                          |
| <p>Any other suggestions about surveillance strategies in low risk patients?</p>                                                                                                                                                                                                                                                                                                                                         |

|                                                                                                                                                                                                                                                                                                                                                                                                   |
|---------------------------------------------------------------------------------------------------------------------------------------------------------------------------------------------------------------------------------------------------------------------------------------------------------------------------------------------------------------------------------------------------|
| <b>Intermediate risk</b>                                                                                                                                                                                                                                                                                                                                                                          |
| <p><b>Intermediate risk</b> patients should have the same surveillance as low risk patients.</p> <ol style="list-style-type: none"> <li>1. Strongly agree</li> <li>2. Agree</li> <li>3. Disagree</li> <li>4. Strongly disagree</li> <li>5. Can't say</li> </ol> <p>Comments/suggestions:</p>                                                                                                      |
| <p><b>Intermediate risk</b> patients should have the same surveillance as high risk patients.</p> <ol style="list-style-type: none"> <li>1. Strongly agree</li> <li>2. Agree</li> <li>3. Disagree</li> <li>4. Strongly disagree</li> <li>5. Can't say</li> </ol> <p>Comments/suggestions:</p>                                                                                                     |
| Any other suggestions about surveillance strategies in intermediate risk patients?                                                                                                                                                                                                                                                                                                                |
| <b>High risk</b>                                                                                                                                                                                                                                                                                                                                                                                  |
| <p>For <b>high risk</b> patients, surveillance should be with annual CT angiogram.</p> <ol style="list-style-type: none"> <li>1. Strongly agree</li> <li>2. Agree</li> <li>3. Disagree</li> <li>4. Strongly disagree</li> <li>5. Can't say</li> </ol> <p>Comments/suggestions:</p>                                                                                                                |
| <p>For <b>high risk</b> patients, surveillance should be with annual CT angiogram and US+X-ray alternately (one year CT, next year US+X-ray).</p> <ol style="list-style-type: none"> <li>1. Strongly agree</li> <li>2. Agree</li> <li>3. Disagree</li> <li>4. Strongly disagree</li> <li>5. Can't say</li> </ol> <p>Comments/suggestions:</p>                                                     |
| <p>For <b>high risk</b> patients, surveillance should be with annual CT angiogram and US alternately (one year CT, next year US).</p> <ol style="list-style-type: none"> <li>1. Strongly agree</li> <li>2. Agree</li> <li>3. Disagree</li> <li>4. Strongly disagree</li> <li>5. Can't say</li> </ol> <p>Comments/suggestions:</p>                                                                 |
| <p>For <b>high risk</b> patients, surveillance should be with US and X-ray annually, with a CT angiogram at 5 years, unless there is sac expansion and/or migration, when CT should be performed.</p> <ol style="list-style-type: none"> <li>1. Strongly agree</li> <li>2. Agree</li> <li>3. Disagree</li> <li>4. Strongly disagree</li> <li>5. Can't say</li> </ol> <p>Comments/suggestions:</p> |
| <p>For <b>high risk</b> patients, surveillance should be with US annually, with a CT angiogram at 5 years, unless there is sac expansion, when CT should be performed.</p>                                                                                                                                                                                                                        |

|                                                                                                                                                                                                                                                                                                                                                                                                                                                                                                                                |
|--------------------------------------------------------------------------------------------------------------------------------------------------------------------------------------------------------------------------------------------------------------------------------------------------------------------------------------------------------------------------------------------------------------------------------------------------------------------------------------------------------------------------------|
| <ol style="list-style-type: none"> <li>1. Strongly agree</li> <li>2. Agree</li> <li>3. Disagree</li> <li>4. Strongly disagree</li> <li>5. Can't say</li> </ol>                                                                                                                                                                                                                                                                                                                                                                 |
| Comments/suggestions:                                                                                                                                                                                                                                                                                                                                                                                                                                                                                                          |
| <p>For <b>high risk</b> patients, surveillance should be with US and X-ray annually, with a CT angiogram only if there is sac expansion and/or migration.</p> <ol style="list-style-type: none"> <li>1. Strongly agree</li> <li>2. Agree</li> <li>3. Disagree</li> <li>4. Strongly disagree</li> <li>5. Can't say</li> </ol>                                                                                                                                                                                                   |
| Comments/suggestions:                                                                                                                                                                                                                                                                                                                                                                                                                                                                                                          |
| <p>For <b>high risk</b> patients, surveillance should be with US annually, with a CT angiogram only if there is sac expansion.</p> <ol style="list-style-type: none"> <li>1. Strongly agree</li> <li>2. Agree</li> <li>3. Disagree</li> <li>4. Strongly disagree</li> <li>5. Can't say</li> </ol>                                                                                                                                                                                                                              |
| Comments/suggestions:                                                                                                                                                                                                                                                                                                                                                                                                                                                                                                          |
| Any other suggestions about surveillance strategies in high risk patients?                                                                                                                                                                                                                                                                                                                                                                                                                                                     |
| <p>What do you think the role of contrast-enhanced US in EVAR surveillance should be (choose one or more)?</p> <ol style="list-style-type: none"> <li>1. It should always be used instead of standard US.</li> <li>2. It should always be used instead of CT.</li> <li>3. It should be used instead of CT in cases where contraindications to CT exist.</li> <li>4. It should be used only in cases of uncertainty as to the origin of endoleak.</li> <li>5. There is no role.</li> <li>6. Other (please, specify).</li> </ol> |
| Comments/suggestions:                                                                                                                                                                                                                                                                                                                                                                                                                                                                                                          |
| <p>What do you think the role of DSA in EVAR surveillance should be?</p> <ol style="list-style-type: none"> <li>1. It should be used in cases of indeterminate endoleak.</li> <li>2. There is no role.</li> <li>3. Other (please, specify)</li> </ol>                                                                                                                                                                                                                                                                          |
| Comments/suggestions:                                                                                                                                                                                                                                                                                                                                                                                                                                                                                                          |
| <p>What do you think the threshold for sac expansion that should trigger further investigations/interventions should be?</p> <ol style="list-style-type: none"> <li>1. 5 mm</li> <li>2. 10 mm</li> <li>3. 15 mm</li> <li>4. There should be no threshold; any sac expansion should be acted upon.</li> <li>5. Other (please, specify)</li> </ol>                                                                                                                                                                               |
| Comments/suggestions:                                                                                                                                                                                                                                                                                                                                                                                                                                                                                                          |

What do you think the threshold for graft migration that should trigger further investigations/interventions should be?

1. 5 mm
2. 10 mm
3. 15 mm
4. There should be no threshold; any graft migration should be acted upon.
5. Other (please, specify)

Comments/suggestions:

**Appendix 3.** Tier 3 survey: Defining endovascular aneurysm repair surveillance strategies. CT, computed tomography; DSA, digital subtraction angiography; EVAR, endovascular aneurysm repair; US, ultrasonography.
